# Clinical Performance of CGMS in Type 1 Diabetic Patients Treated by Continuous Subcutaneous Insulin Infusion Using Insulin Analogs

BRUNO GUERCI, MD, PHD  
MICHÈLE FLORIOT, MD  
PHILIP BÖHME, MD  
DANIELLE DURAIN, RN

MURIEL BENICHO, MD  
STÉPHANIE JELLMANN, MD  
PIERRE DROUIN, MD\*

**OBJECTIVE** — Performance criteria have been established for in vitro blood glucose monitoring, particularly for the self-monitoring of blood glucose using glucose meters. Devices intended for use in the future, such as the continuous glucose monitoring system (CGMS), should satisfy similar criteria, particularly in diabetic patients under intensive therapy.

**RESEARCH DESIGN AND METHODS** — The analysis was conducted on 18 type 1 diabetic patients (not controlled,  $HbA_{1c} > 7.5\%$ ) treated by external pump using insulin analogs. Each patient received a glucose sensor for 3 days during his/her hospitalization and was instructed in its operation. Medtronic criteria were used to determine the accuracy of the CGMS. In addition, the data were analyzed according to American Diabetes Association (ADA) criteria, Clarke Error Grid analysis, and method of residuals, with the glucose oxidase method using a Beckman analyzer used as the reference method. Specificity and sensitivity were evaluated from the viewpoint of accuracy in the detection of hypoglycemia. For nine patients, two glucose sensors were simultaneously inserted into an abdominal site to determine the reproducibility of the system.

**RESULTS** — Among the 33 glucose sensors inserted, 6 (18%) were nonfunctional. The mean duration of CGMS recording was  $63 \pm 12$  h. From all of the 692 sets of data that paired glucose readings and CGMS, the coefficients of correlation ranged from 0.87 to 0.92 and the mean absolute error ranged from 12.8 to 15.7%. The time experienced in hypoglycemia ( $< 55$  mg/dl) was reported at  $86 \pm 62$  min/day. Only 39% of the CGMS values satisfied the ADA precision criteria to within  $\pm 10\%$ , and 19% of these values satisfied the future ADA precision criteria of accuracy to within  $\pm 5\%$ . The means of difference method showed that the CGMS slightly underestimated the plasma glucose values (mean =  $-12$  mg/dl). Error grid analysis showed only 77% of the glucose sensor values were in zone A, and 98.9% were in zones A and B. Two values fell in zone C and a single value fell in zone D. The sensitivity and specificity of the CGMS to detect hypoglycemia were 33 and 96%, respectively. A total of 6,666 paired sensor values were recorded with a coefficient of correlation of 0.84 with a coefficient of variation of 8.25%.

**CONCLUSIONS** — CGMS could be useful in routine clinical practice to provide much more information on the glucose profile than intermittent self-monitoring of blood glucose (SMBG). However, CGMS cannot be used as a replacement for glucose meters because it does not satisfy the conventional performance goals set down for in vitro glucose measurements and could therefore lead to clinically incorrect treatment decisions.

*Diabetes Care* 26:582–589, 2003

From the Service de Diabétologie, Maladies Métaboliques et Maladies de la Nutrition, Centre d'Investigation Clinique-INERM/CHU de NANCY-Hôpital Jeanne d'Arc, Centre Hospitalo-Universitaire de Nancy, Toul cedex, France.

Address correspondence and reprint requests to Dr. Bruno Guerci, MD, PhD, Service de Diabétologie, Maladies Métaboliques et Maladies de la Nutrition, Hôpital Jeanne d'Arc, Centre d'Investigation Clinique, Inserm-CHU de Nancy, B.P. 303, 54201 Toul cedex, France. E-mail: b.guerci@chu-nancy.fr.

Received for publication 13 September 2002 and accepted in revised form 10 December 2002.

\*Deceased, 21 October 2002.

**Abbreviations:** ADA, American Diabetes Association; CGMS, continuous glucose monitoring system; FN, false negative; FP, false positive; SMBG, self-monitoring of blood glucose; TN, true negative; TP, true positive.

A table elsewhere in this issue shows conventional and Système International (SI) units and conversion factors for many substances.

The major objective in the treatment of type 1 diabetes is to maintain blood glucose levels as near as possible to normal values and to obtain levels of  $HbA_{1c}$  close to or below 7% without increasing the incidence of hypoglycemia. Self-monitoring of blood glucose (SMBG) has become a major tool in the management of diabetes. Current recommendations of the American Diabetes Association (ADA) suggest that type 1 diabetic patients undertake SMBG at least three to four times daily (1). The major inconvenience of SMBG is due to the fact that blood glucose is only intermittently measured by fingerstick measurements from which only a partial and therefore incomplete picture of blood glucose fluctuations can be made. In addition, frequent SMBG is often not readily accepted by patients with diabetes because it is invasive and painful, and because the achievement of stable glucose control and the avoidance of hypoglycemic episodes remain elusive for many patients. Despite increased emphasis on frequent blood glucose assay and on the use of blood glucose values to indicate more appropriate strategies of insulin injection, the results of the Diabetes Control and Complications Trial (2) have demonstrated that intensive insulin therapy was associated with a threefold increase in the occurrence of severe hypoglycemia (3). Therefore, the complete elimination, or at least reduction, of pain during SMBG has been the focus of development of new and convenient devices and products for the measurement of blood glucose.

The recent availability of a Continuous Glucose Monitoring System (CGMS) manufactured by Medtronic offers the opportunity for type 1 diabetic patients to match the demands of intensive therapy with the intensive monitoring of blood glucose levels (4). The performance of CGMS has been previously evaluated against blood glucose measurements obtained using patients' home blood glucose

meter readings according to Medtronic criteria (5), but only limited experimental data are available on CGMS performance compared with plasma glucose determinations using the more accurate glucose oxidase method for blood glucose determination (6). The CGMS developed by Medtronic is a holter-style sensor system that continuously monitors interstitial glucose levels. It consists of four components: 1) a pager-sized glucose monitor, 2) a sterile disposable subcutaneous glucose sensor, 3) a cable that connects the sensor to monitor, and 4) a communication system that enables data stored in the monitor to be later downloaded. The glucose sensor is inserted in the abdominal subcutaneous tissue, and it converts measured interstitial glucose levels into an electrical current (measured in nanoamperes [nA]) via an electroenzymatic three-electrode cell in which a constant potential (0.6 V) is maintained between the working electrode and the reference electrode. The principle is based on the generation of hydrogen peroxide from glucose and oxygen via the enzyme glucose oxidase. The sensor calibration requires at least four blood glucose measurements to be made using a glucose meter that must be entered into the monitor each day the CGMS is used. The CGMS continually measures the glucose concentration of the interstitial fluid every 10 s and then stores an average glucose value for each 5-min period, for a total of up to 288 measurements each day. It is designed to provide continuous glucose measurements in the range of 40–400 mg/dl for up to 72 h (7).

The objectives of this study were to evaluate the accuracy, performance, and reproducibility of the CGMS in patients with type 1 diabetes treated by external pumps using insulin analogs, and to compare these with glucose meter readings and against a reference method that measures plasma glucose levels.

## RESEARCH DESIGN AND METHODS

### Patients

The study was carried out on 18 adult type 1 diabetic patients, diagnosed according to ADA criteria (8), who were C-peptide negative ( $<0.3$  nmol/l, 6 min after a 1-mg intravenous injection of glucagon). Patients selected for the study had been coming to our outpatient clinic.

They were being treated for over 1 year by external pump (Medtronic infusor MMT 506, 507c, and 508; Medtronic Technologies, Northridge, CA) using an insulin analog (Humalog, U-100; Lilly France, Saint-Cloud, France) and a disconnectable catheter (Tender set, Disetronic Medical Systems AG, Burgdorf, Switzerland; Sofset QR, Medtronic Technologies). Insulin was infused into the abdomen and the infusion site was changed every 3 days. Patients aged  $<18$  years and who had a BMI  $>30$  kg/m<sup>2</sup> and lack of compliance to SMBG were not included in the study.

All the patients recruited to this study were eligible for participation because their blood glucose control had not been obtained ( $HbA_{1c} >7.5\%$ ) despite intensive insulin therapy using an external pump and a conventional SMBG several times a day. The objective of their hospitalization was to improve glycemic control by adjusting insulin doses and/or diet regimens. The patients had been taught to measure their capillary blood glucose (including preprandial, postprandial, and bedtime periods) using a GlucoTouch memory meter (Lifescan, Roissy, France) to calculate mean blood glucose levels, mean standard deviation of blood glucose, postprandial glucose levels, and incidence of hypoglycemia. Blood glucose concentrations of  $<55$  mg/dl (3 mmol/l) were considered to be indicative of hypoglycemia.

### Study protocol

Patients arrived at the hospital, and a 2-h training session was conducted to educate the patients about CGMS. After sensor insertion and initial calibration of the sensor according to Medtronic procedures, the patients were instructed to enter event markers into the monitor (meals, insulin boluses, exercise, and hypoglycemic episodes) for a period of 72 h. Among the 18 type 1 diabetic patients, 9 had one sensor inserted into the abdominal site, while the other 9 patients had two sensors inserted simultaneously into the abdominal site (one on the left, the other on the right). For these nine patients, the two sensors were carefully calibrated at the same time in order to compare their values and to evaluate the reproducibility of the device. The pump catheter that delivered insulin was inserted at least 10 cm away from the abdominal site where the sensor had been inserted. Insulin doses were adjusted dur-

ing hospitalization. Therapy adjustments by algorithms were based on meter data, but were also partly based on CGMS data downloaded every 24 h.

During continuous glucose monitoring, patients were instructed to measure and enter at least four fingerstick blood glucose values a day to maintain the calibration of the CGMS. During each period of CGMS recording, capillary whole blood sample was collected to check capillary plasma glucose levels with glucose meter at fasting, at each preprandial (before lunch and dinner) and postprandial (1 and 2 h after the meals) period, and at bedtime. Additional blood derived from the same sample was used to determine simultaneously plasma glucose levels with reference glucose oxidase method (see "Biochemical determinations"). The times at which measurements were made were noted precisely so that the corresponding value given by the CGMS could be evaluated. In cases in which symptoms of hypoglycemia appeared, additional measures were performed. Capillary plasma glucose concentrations were obtained using the same glucose meter for all the patients (GlucoTouch; Lifescan). At the end of the CGMS recording period, the data were downloaded from the monitor and the results were analyzed (Medtronic Download program 1.7A).

### Biochemical determinations

Blood samples were taken after a 12-h overnight fast. Glycated hemoglobin ( $HbA_{1c}$ ) was measured by high-performance liquid chromatography on Biorex resins (BioRad, Richmond, CA; normal range 4–6%). All the hematocrits of patients' blood samples were analyzed. Capillary samples were collected into a microtube containing fluoride and then immediately centrifuged (5 min at 18,000g). Plasma glucose concentrations from capillary whole blood samples were assayed using a reagent based on the glucose oxidase and peroxidase enzymatic method (PAP 7500; BioMérieux SA) using a Beckman analyzer (Beckman Glucose Analyzer; Beckman, Fullerton, CA). The samples were taken at fasting, at each preprandial and postprandial period, and at bedtime. The coefficient of variation of this reference method was  $<3\%$ . SMBG determinations using glucose meter (GlucoTouch) were realized simultaneously (nine times/day).

### Statistical analyses

The performance of the CGMS was evaluated by comparing its readings to those obtained at the same time by the glucose oxidase method using the Beckman analyzer and by comparing them to the SMBG readings (GlucoTouch) performed by the patients. Different methods of agreement were used, as follows:

1) The criteria of optimal accuracy defined by Medtronic Technology have been established as follows (7): a correlation between the sensor and meter readings (GlucoTouch) of at least 0.79 and a mean absolute error of no more than 28%. For each day of data collection, the correlation coefficient between the meter readings (GlucoTouch) and the glucose sensor values was calculated. The mean absolute error was calculated by taking the absolute difference between the meter value (GlucoTouch) and the glucose sensor value, and then by dividing by the meter value and averaging all the pairs of data.

2) Based on an ADA consensus statement (1), we used the recommended performance goal of SMBG: a total analytic error of <10% (present ADA criteria) or <5% (future ADA criteria) (9) at glucose concentrations of 30–400 mg/dl.

3) To assess agreement between the monitors and the reference method (Beckman analyzer), we used the method of residuals, referred to as the Bland and Altman method (10). This is defined as the mean, over all data pairs, of the absolute value of the difference between the CGMS and reference glucose (Beckman analyzer), divided by the reference glucose. The mean  $\pm$  1.96 SD represented the 95% CI.

4) Comparisons were also carried out between the reference method (Beckman analyzer) and CGMS and between the reference method and glucose meters (GlucoTouch). In this way, a Clarke Error Grid analysis was performed to assess the clinical impact of treatment decisions that could be based on the results of CGMS readings in comparison with reference results obtained using the Beckman analyzer. The same approach was used to analyze results from the GlucoTouch glucose meter in comparison with reference results obtained using the Beckman analyzer. The Clarke Error Grid separates a typical scatter plot into five zones of clinical significance (11). The zones are de-

finied according to the presence and severity of a treatment error based on the blood glucose assay being evaluated. Zone A represents the absence of treatment error, and zone B represents cases in which the two methods disagree by >20% but still do not lead to a treatment error. Zones C, D, and E represent increasingly large and potentially harmful discrepancies between the evaluation and reference methods. If the new method has a high percentage (>95%) of its pairs in zones A and B, then it is considered clinically acceptable.

5) In terms of accuracy of this system, we analyzed the results by calculating the specificity and sensitivity of the CGMS to correctly detect incidences of hypoglycemia with respect to the comparative plasma blood glucose level determined by the glucose oxidase reference method (Beckman analyzer). Defining hypoglycemia as a value of blood glucose <55 mg/dl, we attributed to each of the CGMS measurements the term of true positive (TP), false positive (FP), true negative (TN), or false negative (FN), according to the simultaneously measured blood glucose value above or below 55 mg/dl. Sensitivity and specificity were defined by the following equations: Sensitivity = TP/(TP + FN), and specificity = TN/(TN + FP). 6) Reproducibility was calculated for sensor values obtained from pairs of two glucose sensors simultaneously inserted and calibrated in 9 of the 18 type 1 diabetic patients.

Data are expressed as means  $\pm$  SD. The data in figures are shown as means  $\pm$  SEM. The distribution of variables was tested for approximation to a Gaussian distribution (normality) using the Kurtosis and Skewness tests. Correlation coefficients were used to compare sensor readings when they were simultaneously placed for nine patients. Statistical significance is implied by a value of  $P < 0.05$ . Statistical analyses were performed using the Statview program (Statview V; BrainPower, Calabasas, CA).

## RESULTS

### Clinical and technical results

The main clinical characteristics of the type 1 diabetic patients are shown in Table 1. All the hematocrits of the patients were in the normal range from 35.6 to 44.1%, which is within the operative

**Table 1—Clinical and biological characteristics of the type 1 diabetic patients**

| Subjects                                  | Mean $\pm$ SD   |
|-------------------------------------------|-----------------|
| <i>n</i> (M/F)                            | 5/13            |
| Age (years)                               | 40.4 $\pm$ 12.5 |
| Diabetes duration (years)                 | 21.4 $\pm$ 15.7 |
| BMI (kg/m <sup>2</sup> )                  | 22.6 $\pm$ 2.6  |
| HbA <sub>1c</sub> (%) (normal range 4–6%) | 7.9 $\pm$ 0.8   |
| Fasting blood glucose (mg/dl)             | 197 $\pm$ 71    |
| Total daily insulin dose (units/day)      | 42.2 $\pm$ 10.2 |
| Basal insulin delivery rate (units/day)   | 23.8 $\pm$ 6.3  |
| Bolus insulin (units/day)                 | 18.4 $\pm$ 8.2  |

specifications of the glucose meters. Among the 33 glucose sensors, 6 (18%) were nonfunctional in terms of their ISIG (sensor current) value being below 10 nA. Data from a total of 27 glucose sensors was thus downloaded and analyzed corresponding to the nine type 1 diabetic patients who used only one glucose sensor, and the other nine patients who used simultaneously two glucose sensors. One glucose sensor was defective after only 25 h of recording. The mean duration of CGMS recording was 63  $\pm$  12 h (range 25–74). We detected some problems of disconnection between the monitor and the cable ( $n = 2$ ) and between the cable and the glucose sensor ( $n = 3$ ). The subcutaneous tolerance of the entire glucose sensor was excellent, without any side effects reported at the site of sensor implantation.

### Performance according to Medtronic criteria

Based on Medtronic performance goals, the agreement between the sensor glucose readings and the meter readings was good. Of the entire 692 pairs of data for glucose meter readings and CGMS, the coefficients of correlation ranged from 0.87 to 0.92 and the mean absolute error ranged from 12.8 to 15.7% (Table 2). The coefficients of correlation and the mean absolute errors were not different for the 3 consecutive days of recording. These paired data were obtained when the values of CGMS ranged from 40 to 400 mg/dl. The mean amount of time per day for which each patient experienced hypoglycemia (<55 mg/dl) was calculated to be 86  $\pm$  62 min.

Table 2—Performance according to Medtronic criteria for the glucose sensors

| Day (functional CGMS) | Paired sensor/meter readings (n) | Correlation coefficient (r) | Mean absolute error (%) | Sensor average (mg/dl) | Meter average (mg/dl) |
|-----------------------|----------------------------------|-----------------------------|-------------------------|------------------------|-----------------------|
| Day 1 (27)            | 257                              | 0.88 ± 0.16                 | 14.5 ± 5.5              | 153 ± 45               | 152 ± 35              |
| Day 2 (25)            | 224                              | 0.92 ± 0.09                 | 12.8 ± 5.2              | 168 ± 35               | 177 ± 29              |
| Day 3 (24)            | 211                              | 0.87 ± 0.15                 | 15.7 ± 7.4              | 156 ± 39               | 165 ± 41              |
| Total                 | 692                              | 0.90 ± 0.13                 | 14.6 ± 6.4              | 159 ± 40               | 165 ± 36              |

Data are means ± SD, unless otherwise noted.

### ADA criteria

The percentage of values within ±10% of the reference value allowed classification of the CGMS and glucose meter according to their accuracy. Only 39% of the CGMS values satisfied the ADA precision criteria to within ±10%, while 19% of these values satisfied the future ADA precision criteria for accuracy to within ±5% (for glucose concentrations from 30 to 400 mg/dl). In contrast, 71 and 43% of the meter values satisfied ADA criteria by being within ±10% and ±5% (present and future precision criteria, respectively) of the reference value.

### Mean absolute relative error: method of residuals

Figure 1 shows the means of differences for the CGMS versus glucose reference methods. This analysis confirmed that the CGMS slightly underestimated the real glucose value as compared with the refer-

ence method, which is indicated by the negative mean of differences (mean = -12 mg/dl). In the same way, the GlucoTouch meter underestimated the values of the glucose reference by 14 mg/dl. However, the dispersion of the values (expressed as mean ± 2 SD) around the mean of differences was lower for the glucose meter (34 mg/dl) than with CGMS (84 mg/dl) (Fig. 1).

### Agreement between glucose sensor and Beckman glucose analyzer

Error grid analysis of data obtained from the 18 patients showed that 94% of the measurements performed with the glucose meter ( $n = 175$ ) were in zone A of the error grid and 100% in zones A and B (Fig. 2). In contrast, only 77% of those performed with the glucose sensor ( $n = 276$ ) were in zone A, and 98.9% were in zones A and B. Furthermore, we found that two values fell in zone C and a single

value in zone D with the glucose sensor. No values in zone E were detected.

The values were subdivided into three different clinical targets of glycemia: within target (80–180 mg/dl), below target (<80 mg/dl), and above target (>180 mg/dl). Among these three targets, there was a good correlation between CGMS and the reference glucose value ( $r = 0.43$ – $0.75$ ,  $P = 0.02$ – $0.0001$ ). We found that glucose meter values were in accordance with the glucose reference values more frequently than values obtained from the glucose sensor (90.7 vs. 75.6%,  $P = 0.0003$ ).

### Sensitivity and specificity

We recorded 276 paired values of blood plasma glucose to analyze the sensitivity and specificity of the CGMS for hypoglycemia detection. When compared with plasma blood glucose, with the limit of 55 mg/dl as the definition of hypoglycemia, we divided results into four quadrants (see Fig. 3) and reported 260 TN, 4 FN, 10 FP, and 2 TP (see RESEARCH DESIGN AND METHODS). From these data, values for sensitivity and specificity of CGMS for hypoglycemia detection were 0.33 and 0.96, respectively. Hence, when the low-glucose alert was set at 55 mg/dl, the CGMS correctly identified 33% (2/[2 + 4]) of the hypoglycemic events. In addition, 96% (260/[260 + 10]) of the time

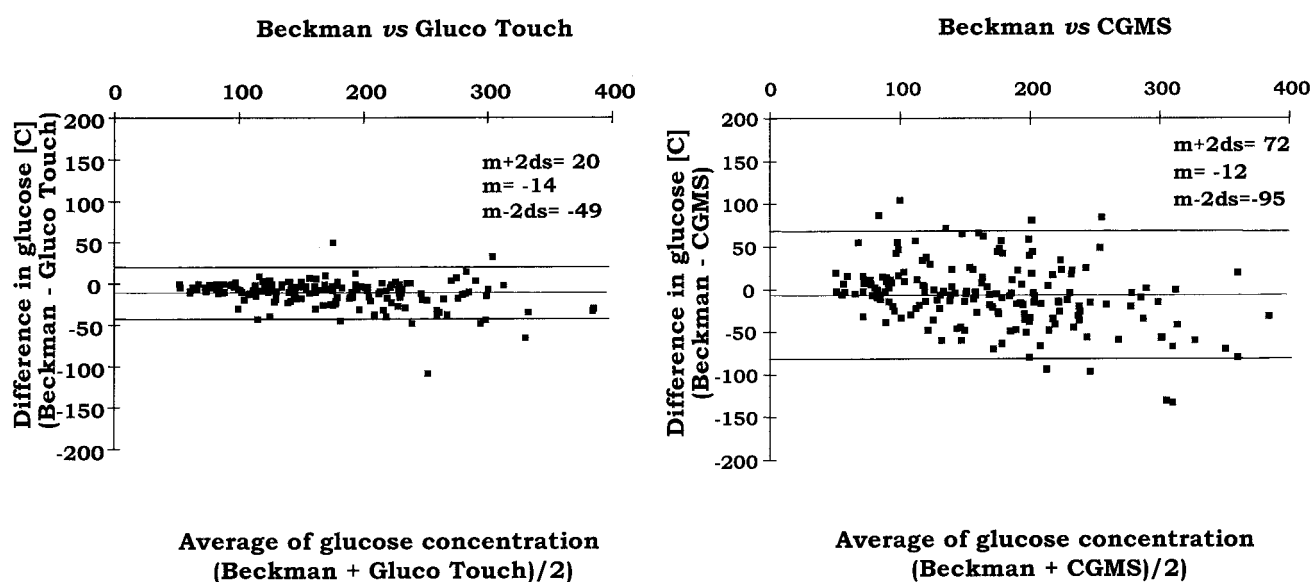

Figure 1—Accuracy of agreement between the two methods (CGMS and GlucoTouch) using the method of residuals. Bland and Altman graphical representation. The magnitude of disagreement was assessed by examining the distribution of differences. The mean ± 1.96 SD represented the 95% CI. M, mean.

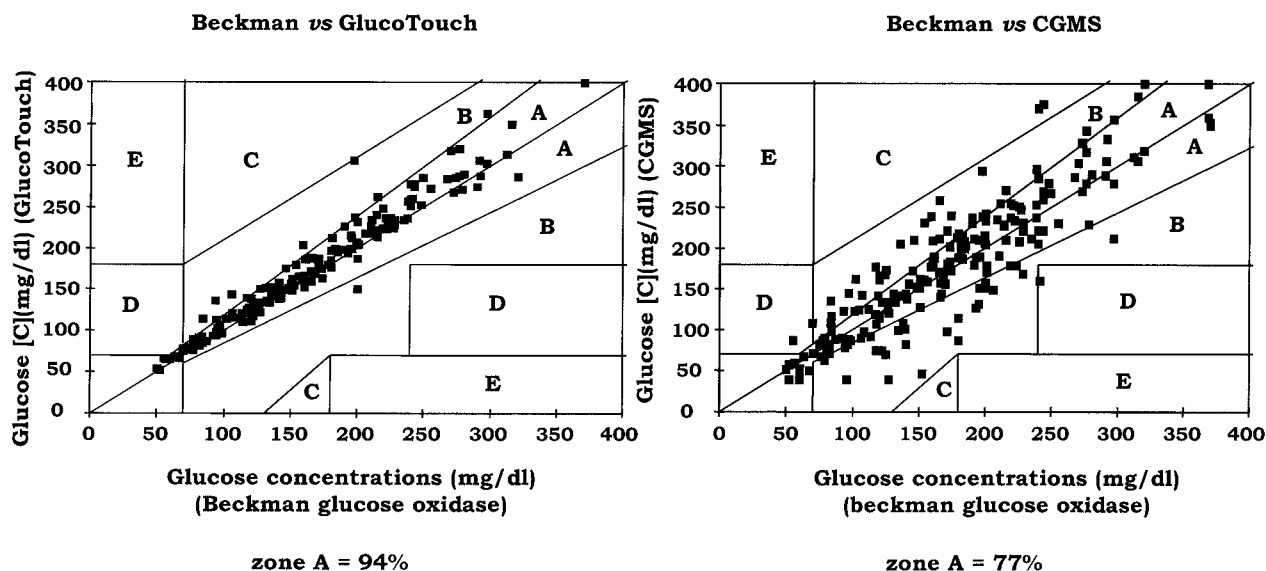

**Figure 2**—Agreement between glucose concentrations in the interstitial fluid (glucose sensor) and capillary plasma glucose concentrations (Beckman glucose analyzer). Comparisons of CGMS and GlucoTouch for the percentages of values in corresponding zones of the Error Grid analysis.

the CGMS correctly identified a value  $\geq 55$  mg/dl in the absence of hypoglycemia.

**Reproducibility**

The inter-sensor coefficient of variation was evaluated by the two simultaneous CGMS sensors placed in nine patients. A total of 6,666 paired values were recorded with a coefficient of correlation of 0.84 between the paired sensors (Fig. 4). The coefficient of variation was evaluated to be 8.25%.

**CONCLUSIONS**

We have evaluated the clinical performance of CGMS in patients under intensive therapy for diabetes, which requires the use of an accurate and reproducible glucose-measuring device for therapy adjustments. We have shown that the CGMS gives much more information than intermittent SMBG; however, CGMS cannot be used as a replacement for glucose meters because it does not satisfy conventional goal performance criteria for in vitro glucose measurements and can lead to clinically incorrect treatment decisions. Our study is the first to analyze the performance of CGMS in comparison with a reference method over several days of real-life conditions.

In our study, technical results and the performance criteria as outlined by Medtronic were in accordance with those of previous studies (5,12,13). As defined in these performance criteria, CGMS ap-

pears to be an accurate device for measuring glucose levels on a continual basis. However, there is some controversy over what methods should be used to analyze the accuracy of these systems; we performed an evaluation of CGMS using dif-

ferent and complementary methods. We have intentionally not used the Spearman's correlation test because the *r* coefficient measures the extent to which two sets of data fit a linear relationship, not the consistency between data (14,15). Ac-

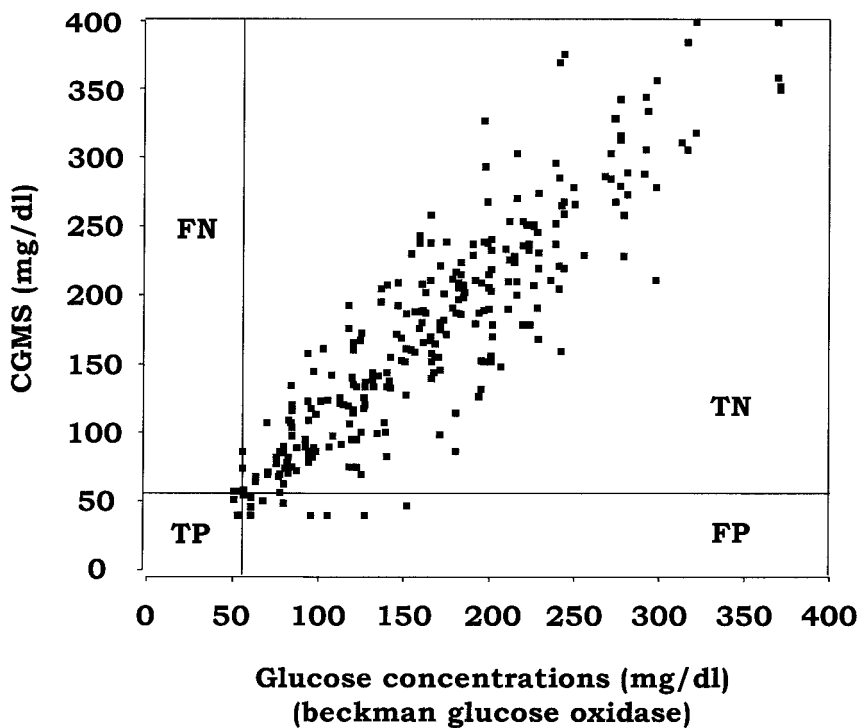

**Figure 3**—Specificity and sensitivity of the CGMS to correctly detect incidences of hypoglycemia with respect to the comparative plasma blood glucose level determined by the glucose oxidase reference method.

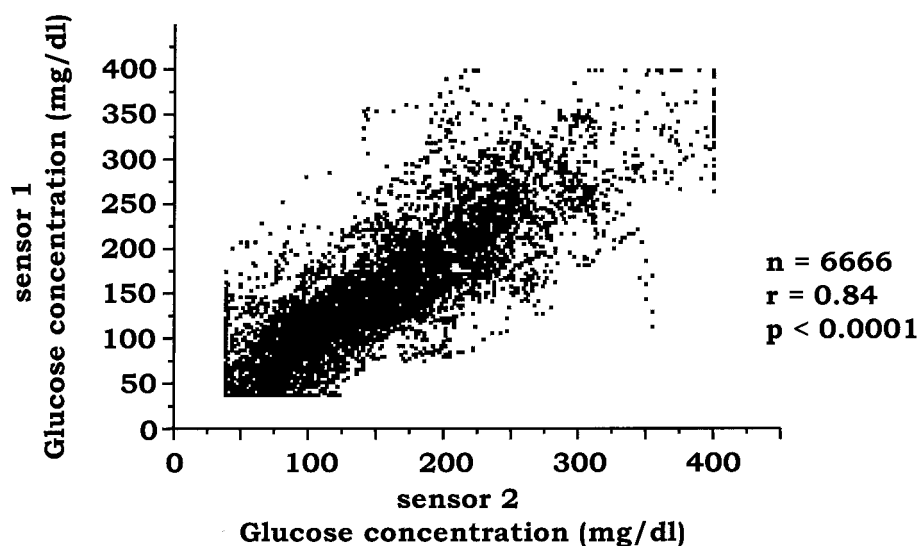

**Figure 4**—Reproducibility of CGMS. Sensor values were obtained from pairs of two glucose sensors simultaneously inserted and calibrated at the same time in nine type 1 diabetic patients.

cording to the ADA consensus statement, the performance goal of the CGMS was very low and inferior to that of glucose meters. Graphical presentation of the results using the Bland and Altman method showed that the dispersion of values against a reference method was greater with CGMS than with the glucose meter. The Error Grid Analysis elaborated by Clarke and colleagues is the sole method that directly affects patients; this method categorizes individual blood glucose values by possible clinical consequences of inaccuracy in the reported values (16,17). As shown by Clarke Error Grid analyses, only 77% of the values of CGMS were in zone A, whereas 94% of the pairs of reference method glucose values fell in the same zone. However, CGMS satisfies the criterion of having at least 95% of the values in zones A and B, due probably to the low rate of cases of hypoglycemia recorded during the study. Finally, the sensitivity of CGMS to detect hypoglycemia was low, as was the reproducibility of the measurements.

The lack of reproducibility of the CGMS suggests difficulties to perform successively two or more recordings by the CGMS. The reproducibility of glucose measurements using the CGMS has been recently analyzed by comparing data provided by two sensors worn simultaneously by 11 diabetic patients (13). However, this study included not only type 1 diabetic patients, but also type 2 diabetic patients and healthy control sub-

jects. Moreover, according to the number of patients included, >3,370 data pairs were recorded in which two sensors were worn simultaneously. In our study, with only nine patients, we recorded twice as many data pairs, suggesting poor accuracy and/or many technical problems associated with analysis of the reproducibility of the CGMS in the study of Metzger et al. (13). Another explanation is that we took advantage of recent improvements in CGMS software, which has been upgraded to resolve the problem of the “midnight shift,” whereas this was not the case in the study by Metzger.

Other devices for invasive or noninvasive glucose measurements have also been recently analyzed. Concerning the detection of hypoglycemia, the Glucowatch Biographer does not appear as an accurate device according to the ADA criteria (18). In a recent study, the sensitivity of Glucowatch to detect hypoglycemic episodes was only 24% when considering 3.9 mmol/l as the threshold of hypoglycemia, whereas specificity was 99% (19). In contrast, a study carried out to evaluate the accuracy of Glucoday, a microdialysis fiber inserted subcutaneously, showed that 97% of the 381 data pairs fell in the A and B regions of the error grid analysis (20). It is worth noting that this study compared the new subcutaneous glucose sensor to the glucose oxidase (Beckman) reference method. The results obtained “online” by the microdialysis method demonstrated that the sys-

tem was extremely sensitive in identifying clinical hypoglycemia.

It has been demonstrated that the performance of CGMS also depends on subgroups within the studied population (21). CGMS performance statistics can be strongly influenced by the level and range of the standard blood glucose meter values used to calculate them, independently of the quality of recording or of potential technical or local problems with the sensors used. Specifically, the magnitude of the correlation coefficient is directly related to variations in the meter values. In general, the coefficients of variation were excellent between CGMS data and glucose meter data in type 1 diabetic patients. Patients with type 2 diabetes and pregnant patients have significantly less variable glucose levels when compared with patients with type 1 diabetes (21). This could explain the differences in CGMS performance statistics for these population subgroups. Consequently, it appears inappropriate to simultaneously analyze the performance of CGMS for these different groups.

We demonstrated that CGMS underestimated the plasma glucose values when compared with the reference glucose oxidase method using a Beckman analyzer. This is an important point because several studies have emphasized the clinical accuracy of this device, particularly in identifying the incidence of hypoglycemic episodes while maintaining fair blood glucose control (22,23). The fact that CGMS underestimates plasma values is not surprising because it has been recently demonstrated that the concentration of glucose in the interstitial fluid does not accurately reflect blood glucose levels. Several studies revealed frequent and prolonged periods of asymptomatic hypoglycemia (sometimes unawareness) in insulin-treated patients when they were monitored for 3 or more days by subcutaneous glucose sensor (23,24). They reported a long and prolonged period of hypoglycemia, especially during the night, of 2 h or more per night in almost 70% of children (23). But, it is difficult to explain how these patients with a recent history of diabetes could experience such long periods of asymptomatic hypoglycemia. In our study, we found that the diabetic patients had a mean period of hypoglycemia recorded by CGMS of 86 min per day.

The concentration of glucose in the

interstitial fluid does not always accurately reflect blood glucose levels due to the possibility of a significant time lag between the two (6). Venous plasma glucose is close to interstitial fluid glucose under steady-state conditions in healthy subjects (25); however, the time lag between interstitial fluid and plasma glucose depends on the rate of glucose variations. During oral glucose tolerance tests (OGTT) and hyperglycemic conditions, the lag time was greater than 8 min. Delays in interstitial fluid equilibration observed in the study of Rebrin et al. (6) were typically <10 min. Under basal conditions, the differences between interstitial fluid glucose from adipose tissue and plasma were ~23 mg/dl, while in hyperglycemic clamp experiments, the difference was found to be ~47 mg/dl.

During a hyperinsulinemic-euglycemic clamp, the performance of CGMS remained accurate during the phase of euglycemia and then of hypoglycemia (3.1 mmol/l), but remained 20% lower than plasma glucose levels (26). In addition, during recovery from hypoglycemia, sensor readings lagged behind increases in plasma glucose but remained 15% lower than plasma glucose levels, and never returned to the steady state level of 8.6 mmol/l even 60 min after recovering from hypoglycemia.

Cheyne et al. (27) reported on the performance of CGMS during and in recovery from a controlled hyperinsulinemic-hypoglycemic clamp (2.5 mmol/l for 60 min) experiment in eight healthy volunteers. The time taken for the sensor to achieve a reading >4 mmol/l (threshold of euglycemia for this study) after hypoglycemia was delayed by an average of 30 min (range 0–55), suggesting that CGMS may overestimate the degree of and duration of hypoglycemia. Other authors confirm that during the recovery from hypoglycemia, subcutaneous glucose concentrations remain low for a prolonged period of time (28). Our results are in accordance with this phenomenon of underestimation of glucose levels using the glucose sensor.

CGMS might, however, be useful in routine clinical practice to gauge the glucose profile during specific clinical situations. For example, a pilot study conducted in pediatric type 1 diabetic subjects has shown that CGMS was useful to detect abnormal patterns of glycemia (24). In this study, the data provided by

CGMS for 3 days gave some information for optimizing glucose control and, consequently, to reduce HbA<sub>1c</sub> levels in these patients for a 3- to 6-month time period. Another study conducted in pediatric patients with type 1 diabetes demonstrated the limitations of conventional SMBG (23). In particular, these authors showed that despite an acceptable glucose control observed in these patients, according to the HbA<sub>1c</sub> level and target of blood glucose, some of the patients often experienced hypoglycemic episodes. However, no randomized prospective study has proved an efficacy of CGMS in the improvement of glycemic control.

In summary, whatever the method used, the accuracy of CGMS appears too low. CGMS does not satisfy the ADA criteria for in vitro glucose measurements, and it can lead to clinically incorrect treatment decisions, as shown here by Clarke Error Grid analyses. In particular, the use of a glucose sensor for monitoring the insulin treatment of type 1 diabetic patients must take into account the performance limitations of this method, because this device appears to overestimate hypoglycemic episodes. Finally, its reproducibility should be improved in the future when successive monitoring is performed on the same patient. The improvement remains insufficient with regard to most of the official performance goals. However, the CGMS in routine clinical practice is useful for analysis of the glucose profile under real-life conditions, as well as during the nocturnal period to detect dawn phenomenon and unawareness hypoglycemic episodes, as well as postprandial blood glucose excursions, in gauging the influence of physical activity on the glucose profile, and to analyze pharmacological studies (insulin analogs, hypoglycemic agents).

**Acknowledgments**—This study was presented as an oral communication at the last “Hypoglycemia meeting,” Assisi, Italy, May 2001.

This article is dedicated to Professor Pierre Drouin, deceased 21 October 2002.

## References

1. Clinical practice recommendations 1996: American Diabetes Association. *Diabetes Care* 19 (Suppl. 1):S1–S118, 1996
2. The Diabetes Control and Complications Trial Research Group: The effect of inten-

3. The DCCT Research Group: Epidemiology of severe hypoglycemia in the Diabetes Control and Complications Trial. *Am J Med* 90:450–459, 1991
4. Gross TM, Mastrototaro JJ: Efficacy and reliability of the continuous glucose monitoring system. *Diabetes Technol Ther* 2:S19–S26, 2000
5. Gross TM, Bode BW, Einhorn D, Kaye DM, Reed JH, White NH, Mastrototaro JJ: Performance evaluation of the Minimed Continuous Glucose Monitoring System during patient home use. *Diabetes Technol Ther* 2:49–56, 2000
6. Rebrin K, Steil GM, Van Antwerp WP, Mastrototaro JJ: Subcutaneous glucose predicts plasma glucose independent of insulin: implications for continuous monitoring. *Am J Physiol* 277:E561–E571, 1999
7. Mastrototaro J: The Minimed Continuous Glucose Monitoring System (CGMS). *J Pediatr Endocr Metab* 12:751–758, 1999
8. The Expert Committee on the Diagnosis and Classification of Diabetes Mellitus: Report of the Expert Committee on the Diagnosis and Classification of Diabetes Mellitus. *Diabetes Care* 20:1183–1197, 1997
9. American Diabetes Association: Tests of glycemia in diabetes (Position Statement). *Diabetes Care* 25 (Suppl. 1):S97–S99, 2002
10. Bland JM, Altman DG: Statistical methods for assessing agreement between two methods of clinical measurement. *Lancet* 1:307–310, 1986
11. Clarke WL, Cox D, Gonder-Frederick LA, Carter W, Pohl SL: Evaluating clinical accuracy of systems for self-monitoring of blood glucose. *Diabetes Care* 10:622–628, 1987
12. Bode BW, Gross TM, Thornton KR, Mastrototaro JJ: Continuous glucose monitoring used to adjust diabetes therapy improves glycosylated hemoglobin: a pilot study. *Diabetes Res Clin Pract* 46:183–190, 1999
13. Metzger M, Leibowitz G, Wainstein J, Glaser B, Raz I: Reproducibility of glucose measurements using the glucose sensor. *Diabetes Care* 25:1185–1191, 2002
14. Poirier JY, Le Prieur N, Campion L, Guilhem I, Allanic H, Maugendre D: Clinical and statistical evaluation of self-monitoring blood glucose meters. *Diabetes Care* 21:1919–1924, 1998
15. Lee J, Koh D, Ong CN: Statistical evaluation of agreement between two methods for measuring a quantitative variable. *Comput Biol Med* 19:61–70, 1989
16. Parkes JL, Slatin SL, Pardo S, Ginsberg

- BH: A new consensus error grid to evaluate the clinical significance of inaccuracies in the measurement of blood glucose. *Diabetes Care* 23:1143–1148, 2000
17. Gough DA, Botvinick EL: Reservations on the use of error grid analysis for the validation of blood glucose assays. *Diabetes Care* 20:1034–1036, 1997
  18. Garg SK, Potts RO, Ackerman NR, Fermi SJ, Tamada JA, Chase HP: Correlation of fingerstick blood glucose measurements with GlucoWatch biographer glucose results in young subjects with type 1 diabetes. *Diabetes Care* 22:1708–1714, 1999
  19. Pitzer KR, Desai S, Dunn T, Edelman S, Jayalakshmi Y, Kennedy J, Tamada JA, Potts RO: Detection of hypoglycemia with the GlucoWatch biographer. *Diabetes Care* 24:881–885, 2001
  20. Maran A, Crepaldi C, Tiengo A, Grassi G, Vitali E, Pagano G, Bistoni S, Calabrese G, Santeusano F, Leonetti F, Ribaud M, Di Mario U, Annuzzi G, Genovese S, Riccardi G, Previti M, Cucinotta D, Giorgino F, Bellomo A, Giorgino R, Poscia A, Varalli M: Continuous subcutaneous glucose monitoring in diabetic patients: a multicenter analysis. *Diabetes Care* 25:347–352, 2002
  21. Gross TM, Terr Veer A: Continuous glucose monitoring in previously unstudied population subgroups. *Diabetes Technol Ther* 2:S27–S34, 2000
  22. Chase HP, Kim LM, Owen SL, MacKenzie TA, Klingensmith GJ, Murtfeldt R, Garg SK: Continuous subcutaneous glucose monitoring in children with type 1 diabetes. *Pediatrics* 107:222–226, 2001
  23. Boland E, Monsod T, Delucia M, Brandt CA, Fernando S, Tamborlane WV: Limitations of conventional methods of self-monitoring of blood glucose: lessons learned from 3 days of continuous glucose sensing in pediatric patients with type 1 diabetes. *Diabetes Care* 24:1858–1862, 2001
  24. Kaufman FR, Gibson LC, Halvorson M, Carpenter S, Fisher LK, Pitukcheewanont P: A pilot study of the continuous glucose monitoring system: clinical decisions and glycemic control after its use in pediatric type 1 diabetic subjects. *Diabetes Care* 24:2030–2034, 2001
  25. hennadil SH, Rennert JL, Wenzel BJ, Hazen KH, Ruchti TL, Block MB: Comparison of glucose concentration in interstitial fluid and capillary and venous blood during rapid changes in blood glucose levels. *Diabetes Technol Ther* 3:357–365, 2001
  26. Monsod TP, Flanagan DE, Rife F, Saenz R, Caprio S, Sherwin RS, Tamborlane WV: Do sensor glucose levels accurately predict plasma glucose concentrations during hypoglycemia and hyperinsulinemia? *Diabetes Care* 25:889–893, 2002
  27. Kerr D, Cheyne EH, Weiss M, Ryder J, Cavan DA: Accuracy of Minimed Continuous Glucose Monitoring System during hypoglycemia (Abstract). *Diabetologia* 44 (Suppl. 1):A239, 2001
  28. Aussehat B, Dupire-Angel M, Gifford R, Klein JC, Wilson GS, Reach G: Interstitial glucose concentration and glycemia: implications for continuous subcutaneous glucose monitoring. *Am J Physiol Endocrinol Metab* 278:E716–E728, 2000
